# Supplementary material
Source: PubMed Central journal article supplement (PMC1964848)
Supplement: pnas_0704166104_5.pdf [file pnas_0704166104_5.pdf]

**Table 1.** Up-regulation of mitotic genes in shoots conferred by *CYCD3;1* OE

| MIPS ID   | Description (2006)                                                                                                                                                                                                                                       | A       | B       | C       | D       | Robust change call (1 week old shoots) | Robust change call (2 week old shoots) |
|-----------|----------------------------------------------------------------------------------------------------------------------------------------------------------------------------------------------------------------------------------------------------------|---------|---------|---------|---------|----------------------------------------|----------------------------------------|
| At2g47500 | kinesin motor protein-related                                                                                                                                                                                                                            | 543.9   | 1090.05 | 478     | 465.75  | I                                      |                                        |
| At4g15830 | expressed protein                                                                                                                                                                                                                                        | 958.8   | 2551.75 | 740.8   | 1203.8  | I                                      |                                        |
| At1g44110 | Arath;CYCA1;1                                                                                                                                                                                                                                            | 1163.85 | 3043.4  | 631.45  | 1350.35 | I                                      |                                        |
| At5g17160 | expressed protein                                                                                                                                                                                                                                        | 1348.85 | 3172.8  | 870.35  | 1253.85 | NC                                     |                                        |
| At5g15510 | expressed protein                                                                                                                                                                                                                                        | 216.05  | 680.6   | 163.35  | 361.7   | I                                      |                                        |
| At5g33300 | chromosome-associated kinesin-related, contains weak similarity to chromosome-associated kinesin KIF4A (Chromokinesin) (Swiss-Prot:P33174) (Mus musculus)                                                                                                | 354.5   | 766.95  | 241.4   | 672.85  | I                                      |                                        |
| At5g67270 | microtubule-associated EB1 family protein, similar to SP:Q9UPY8 Microtubule-associated protein RP/EB family member 3 (Protein EB3) (Homo sapiens); contains Pfam profiles PF00307: Calponin homology (CH) domain, PF03271: EB1 protein                   | 659.5   | 1747.45 | 396.25  | 958.65  | I                                      |                                        |
| At5g66230 | expressed protein                                                                                                                                                                                                                                        | 702.95  | 2146.6  | 439.65  | 738.2   | I                                      |                                        |
| At5g60930 | chromosome-associated kinesin, putative, microtubule-associated motor KIF4, Mus musculus, PIR:A54803                                                                                                                                                     | 495.9   | 1417.05 | 288.6   | 670.15  | I                                      |                                        |
| At5g48310 | expressed protein                                                                                                                                                                                                                                        | 442.25  | 1385.1  | 232.1   | 662.35  | I                                      |                                        |
| At5g62550 | expressed protein                                                                                                                                                                                                                                        | 277.85  | 900.7   | 179.9   | 347.3   | I                                      |                                        |
| At5g55830 | lectin protein kinase, putative, similar to receptor lectin kinase 3 (Arabidopsis thaliana) gi:4100060:gb:AAD00733; contains protein kinase domain, Pfam:PF00069; contains legume lectins alpha and beta domains, Pfam:PF00138 and Pfam:PF00139          | 169.55  | 597.05  | 154.45  | 327.5   | I                                      |                                        |
| At5g55520 | similar to expressed protein [Arabidopsis thaliana] (TAIR:At4g26660.1); similar to kinesin heavy chain, putative [Oryza sativa (japonica cultivar-group)] (GB:AAV35794.1)                                                                                | 324.25  | 758.5   | 153.85  | 365     | I                                      |                                        |
| At5g51600 | microtubule associated protein (MAP65/ASE1) family protein, low similarity to SP:P50275 Anaphase spindle elongation protein (Saccharomyces cerevisiae), protein regulating cytokinesis 1 (PRC1) (Homo sapiens) Gi:2865521; contains Pfam profile PF03999 | 507     | 1077.65 | 249.1   | 386.9   | I                                      |                                        |
| At5g45700 | NLI interacting factor (NIF) family protein, contains Pfam profile PF03031: NLI interacting factor [AT5G36710, expressed protein];[AT5G36800, expressed protein]                                                                                         | 389.95  | 812.25  | 218.3   | 267.75  | I                                      |                                        |
| At5g36710 | similar to kinesin motor protein-related [Arabidopsis thaliana] (TAIR:At5g02370.1); similar to OSJNB0006N15.7 [Oryza sativa (japonica cultivar-group)] (GB:XP_472192.1); contains InterPro domain Kinesin, motor region (InterPro:IPR001752)             | 2311.3  | 5102.6  | 1431.45 | 2353.35 | I                                      |                                        |
| At5g23910 | Kinesin, motor region (InterPro:IPR001752)                                                                                                                                                                                                               | 200.15  | 686.15  | 153.6   | 371.2   | I                                      |                                        |
| At5g13840 | CCS52b                                                                                                                                                                                                                                                   | 762.45  | 1985.8  | 389.1   | 1206.7  | I                                      |                                        |
| At5g11300 | Arath;CYCA2;2                                                                                                                                                                                                                                            | 230.2   | 431.55  | 241.6   | 333.2   | I                                      |                                        |
| At5g11510 | AtMYB3R4                                                                                                                                                                                                                                                 | 509.45  | 1047.25 | 293.05  | 446.65  | I                                      |                                        |
| At5g02370 | kinesin motor protein-related, kinesin, Xenopus laevis, EMBL:XL249840                                                                                                                                                                                    | 355.5   | 652.05  | 266.3   | 343.65  | I                                      |                                        |
| At3g60840 | microtubule associated protein (MAP65/ASE1) family protein, low similarity to protein regulating cytokinesis 1 (PRC1) (Homo sapiens) Gi:2865521; contains Pfam profile PF03999: Microtubule associated protein (MAP65/ASE1 family)                       | 468.8   | 1112.35 | 386.6   | 598.05  | I                                      |                                        |
| At3g55660 | member of KPP-like gene family, homolog of KPP (kinase partner protein) gene in tomato; expressed protein, contains Pfam profile PF03759: Domain of unknown function (DUF315)                                                                            | 347.4   | 704.5   | 160.35  | 357.5   | I                                      |                                        |
| At3g51280 | male sterility MS5, putative, similar to male sterility MS5 (Arabidopsis thaliana) Gi:3859112; contains Pfam profile PF00515 TPR Domain                                                                                                                  | 631.75  | 1703.5  | 487.25  | 682.6   | I                                      |                                        |
| At4g35620 | Arath;CYCB2;2                                                                                                                                                                                                                                            | 465.2   | 1147.4  | 331.65  | 546.85  | I                                      |                                        |
| At4g33260 | WD repeat; CDC20-like                                                                                                                                                                                                                                    | 1394.05 | 4552.95 | 718.8   | 1878.15 | I                                      |                                        |
| At4g33400 | dem protein-related / defective embryo and meristems protein-related, identical to dem Gi:2190419 from (Lycopersicon esculentum)                                                                                                                         | 1170.75 | 2748.7  | 678.3   | 1630.5  | I                                      |                                        |
| At4g32830 | Aurora-like kinase 2; ALK2                                                                                                                                                                                                                               | 1127    | 2973.5  | 680.95  | 1920.3  | I                                      |                                        |

| MIPS ID   | Description (2006)                                                                                                                                                                                                                                                                                                                                                                       | A       | B       | C      | D       | Robust change call (1 week old shoots) | Robust change call (2 week old shoots) |
|-----------|------------------------------------------------------------------------------------------------------------------------------------------------------------------------------------------------------------------------------------------------------------------------------------------------------------------------------------------------------------------------------------------|---------|---------|--------|---------|----------------------------------------|----------------------------------------|
| At3g25980 | mitotic spindle checkpoint protein, putative (MAD2), identical to Swiss-Prot:Q9LU93 mitotic spindle checkpoint protein MAD2 (Arabidopsis thaliana)                                                                                                                                                                                                                                       | 883.3   | 2326.75 | 486.6  | 1099.9  | I                                      | I                                      |
| At4g28230 | [AT4G28230, expressed protein j];[AT4G28220, NADH dehydrogenase-related, similar to 64 kDa mitochondrial NADH dehydrogenase (Neurospora crassa) Gi:4753821, alternative NADH-dehydrogenase (Yarrowia lipolytica) Gi:3718005; contains Pfam profile PF00070: Py expressed protein, weak similarity to phragmoplast-associated kinesin-related protein 1 (Arabidopsis thaliana) Gi:8745333 | 241.15  | 771.7   | 198.05 | 292.8   | I                                      | I                                      |
| At4g28660 | high mobility group (HMG1/2) family protein, similar to HMG2B (Homo sapiens) Gi:32335; contains Pfam profile PF00505: HMG (high mobility group) box                                                                                                                                                                                                                                      | 168.95  | 411.35  | 104.45 | 274.1   | I                                      | I                                      |
| At4g23800 | calcium-binding EF hand family protein, similar to EH-domain containing protein 1 from {Mus musculus} SP:Q9WVK4, {Homo sapiens} SP:Q9H4M9, receptor-mediated endocytosis 1 from {Caenorhabditis elegans} Gi:1348775, Gi:1348777, Gi:1348779                                                                                                                                              | 322.45  | 701.8   | 194.65 | 395.45  | I                                      | I                                      |
| At4g05520 | kinesin-like protein A, putative, kinesin like protein A, Arabidopsis thaliana, gb:Q07970                                                                                                                                                                                                                                                                                                | 486.15  | 1685.9  | 266.7  | 583.05  | I                                      | I                                      |
| At4g02800 | expressed protein, similar to A, thaliana hypothetical protein T6B20.12 (1946366)                                                                                                                                                                                                                                                                                                        | 522.45  | 756.05  | 309.9  | 488.4   | I                                      | I                                      |
| At4g01730 | zinc finger (DHC type) family protein, contains Pfam profile PF01529: DHC zinc finger domain spindle checkpoint protein-related, similar to spindle checkpoint protein BubR1 (Gi:22128593) (Xenopus laevis); similar to Mitotic checkpoint serine/threonine-protein kinase BUB1 beta (EC 2.7.1.-) (MAD3/BUB1-related protein kinase)                                                     | 538.35  | 1092.05 | 380.1  | 660.45  | I                                      | I                                      |
| At2g33560 | DNA topoisomerase, ATP-hydrolyzing / DNA topoisomerase II / DNA gyrase (TOP2), identical to SP:P30182 DNA topoisomerase II (EC 5.99.1.3) (Arabidopsis thaliana)                                                                                                                                                                                                                          | 213.1   | 509.6   | 149.5  | 218.35  | I                                      | I                                      |
| At3g23890 | expressed protein                                                                                                                                                                                                                                                                                                                                                                        | 608.65  | 2935.55 | 416.4  | 1187.25 | I                                      | I                                      |
| At3g14190 | expressed protein                                                                                                                                                                                                                                                                                                                                                                        | 1134.1  | 3263.2  | 683.9  | 1552.25 | I                                      | I                                      |
| At3g19590 | WD-40 repeat family protein / mitotic checkpoint protein, putative, contains 5 WD-40 repeats (PF00400) (1 weak); similar to testis mitotic checkpoint protein BUB3 (GB:AAC28439.SP:O43684)(Homo sapiens)                                                                                                                                                                                 | 1014    | 2100.3  | 715.25 | 995     | I                                      | I                                      |
| At3g20150 | kinesin motor family protein, contains Pfam domain, PF00225: Kinesin motor domain                                                                                                                                                                                                                                                                                                        | 347.35  | 1126.95 | 212    | 431.6   | I                                      | I                                      |
| At3g12870 | expressed protein                                                                                                                                                                                                                                                                                                                                                                        | 1150.85 | 2679.95 | 796.75 | 1203.35 | I                                      | I                                      |
| At3g27330 | zinc finger (C3HC4-type RING finger) family protein, contains Pfam profiles: PF00097 zinc finger, C3HC4 type (RING finger), PF01697 Domain of unknown function                                                                                                                                                                                                                           | 233.75  | 485.6   | 110.3  | 184.15  | I                                      | I                                      |
| At3g23670 | phragmoplast-associated kinesin-related protein, putative, similar to kinesin like protein GB:CAB10194 from (Arabidopsis thaliana)                                                                                                                                                                                                                                                       | 210.75  | 652.15  | 122.5  | 304.45  | I                                      | I                                      |
| At3g02640 | expressed protein                                                                                                                                                                                                                                                                                                                                                                        | 2741.7  | 8121.5  | 1617.4 | 3668.85 | I                                      | I                                      |
| At1g72250 | kinesin motor protein-related                                                                                                                                                                                                                                                                                                                                                            | 310     | 879.45  | 169.95 | 464.4   | I                                      | I                                      |
| At3g03130 | expressed protein; expression supported by MPSS                                                                                                                                                                                                                                                                                                                                          | 467.45  | 684.95  | 219.8  | 257.7   | I                                      | NC                                     |
| At3g11520 | Arath;CYCB1;3                                                                                                                                                                                                                                                                                                                                                                            | 696.5   | 1501.65 | 403    | 925.75  | I                                      | I                                      |
| At1g20590 | Arath;CYCB2;5                                                                                                                                                                                                                                                                                                                                                                            | 455.3   | 1111.25 | 330.35 | 554.6   | I                                      | I                                      |
| At1g34355 | forkhead-associated domain-containing protein / FHA domain-containing protein                                                                                                                                                                                                                                                                                                            | 199.7   | 631.55  | 164.65 | 295.65  | I                                      | I                                      |
| At1g76540 | Arath;CDKB2;1                                                                                                                                                                                                                                                                                                                                                                            | 987.2   | 3669.3  | 840.65 | 1706.65 | I                                      | I                                      |
| At1g33940 | [AT5G18700, protein kinase-related, contains protein kinase domain, INTERPRO:IPR000719];[AT1G33940, expressed protein]                                                                                                                                                                                                                                                                   | 899.85  | 1975.2  | 686.25 | 1097.35 | I                                      | I                                      |
| At1g69400 | transducin family protein / WD-40 repeat family protein, similar to mitotic checkpoint protein (Gi:9294423) (Arabidopsis thaliana); similar to mitotic checkpoint protein (BUB3) (SP:O43684) (Homo sapiens)                                                                                                                                                                              | 173.2   | 327.8   | 176.75 | 337     | I                                      | I                                      |
| At1g34460 | Arath;CYCB1;5                                                                                                                                                                                                                                                                                                                                                                            | 302.15  | 1077.9  | 286.1  | 411.35  | I                                      | I                                      |

| MIPS ID   | Description (2006)                                                                                                                                                                                                                                             | A       | B        | C       | D        | Robust change call (1 week old shoots) | Robust change call (2 week old shoots) |
|-----------|----------------------------------------------------------------------------------------------------------------------------------------------------------------------------------------------------------------------------------------------------------------|---------|----------|---------|----------|----------------------------------------|----------------------------------------|
| At1g76310 | Arath;CYCB2;4                                                                                                                                                                                                                                                  | 445.8   | 1250.2   | 284.65  | 670.71   | I                                      | I                                      |
| At1g50490 | ubiquitin-conjugating enzyme 20 (UBC20), nearly identical to ubiquitin-conjugating enzyme UBC20 (Arabidopsis thaliana) Gi:22530867; contains Pfam profile PF00179: Ubiquitin-conjugating enzyme                                                                | 1595.6  | 3312.75  | 1095.85 | 1686.71  | I                                      |                                        |
| At1g59540 | kinesin motor protein-related, similar to kinesin motor protein (kin2) Gi:2062751 from (Ustilago maydis)                                                                                                                                                       | 457.2   | 760.15   | 189.35  | 371.351  | I                                      |                                        |
| At1g02730 | cellulose synthase family protein, similar to cellulose synthase catalytic subunit (gi:13925881) from Nicotiana glauca, cellulose synthase-4 (gi:9622880) from Zea mays                                                                                        | 3293.35 | 10152.55 | 1869.75 | 4387.451 | I                                      | I                                      |
| At1g16330 | Arath;CYCB3;1                                                                                                                                                                                                                                                  | 272.9   | 682.4    | 206.35  | 3581     | I                                      |                                        |
| At1g20930 | Arath;CDKB2;2                                                                                                                                                                                                                                                  | 464.6   | 1326.7   | 412.95  | 625.81   | I                                      |                                        |
| At2g17620 | Arath;CYCB2;1                                                                                                                                                                                                                                                  | 234.95  | 416.25   | 120.4   | 255.71   | I                                      | NC                                     |
| At2g28620 | kinesin motor protein-related                                                                                                                                                                                                                                  | 209.05  | 538.2    | 245     | 256.61   | I                                      |                                        |
| At2g16270 | expressed protein, and genefinder; expression supported by MPSS                                                                                                                                                                                                | 298.35  | 753      | 193.15  | 220.21   | I                                      |                                        |
| At2g25060 | plastocyanin-like domain-containing protein                                                                                                                                                                                                                    | 2876.9  | 7534     | 1628.2  | 3859.51  | I                                      |                                        |
| At1g08560 | syntaxin-related protein KNOLLE (KN) / syntaxin 11 (SYP11), identical to SP:Q42374 Syntaxin-related protein KNOLLE (Syntaxin 11) (Arabidopsis thaliana); BAC F22O13 has a deletion of a cytosine at position 7887                                              | 2732    | 8422.9   | 1572.1  | 4162.551 | I                                      | I                                      |
| At1g03780 | targeting protein-related, similar to microtubule-associated protein / targeting protein for Xklp2 (TPX2) (Gi:8926138) (Homo sapiens); similar to Restricted expression proliferation associated protein 100 (p100) (Differentially expressed in lung cells 2) | 398.2   | 1205.95  | 245.8   | 468.251  | I                                      |                                        |
| At1g23790 | expressed protein                                                                                                                                                                                                                                              | 329.25  | 912.95   | 284.45  | 463.351  | I                                      |                                        |
| At2g22610 | kinesin motor protein-related                                                                                                                                                                                                                                  | 358.8   | 703.75   | 206.8   | 328.851  | I                                      |                                        |
| At2g25880 | Aurora-like kinase 1; ALK1                                                                                                                                                                                                                                     | 698     | 1877.7   | 393.3   | 7751     | I                                      |                                        |
| At2g44190 | expressed protein, contains Pfam profile: PF04484 family of unknown function (DUF566)                                                                                                                                                                          | 236.7   | 701.4    | 213.35  | 329.151  | I                                      |                                        |
| At2g26760 | Arath;CYCB1;4                                                                                                                                                                                                                                                  | 616.65  | 1392.05  | 351.8   | 418.651  | I                                      |                                        |
| At4g22860 | no_match                                                                                                                                                                                                                                                       | 245.35  | 493.7    | 189.75  | 2181     | I                                      |                                        |

Eighty-two mitotic genes previously identified as showing tight coexpression with a cohort of mitotic cyclins in suspension-cultured cells using two different synchrony methods (1) were used to assay the extent of mitotic cell cycle activity. Transcript levels for each of the 72 of these mitotic genes were up-regulated in *CYCD3;1* OE plants, and the data for this is shown with MIPS identifiers (MIPS ID) and gene descriptions. Duplicate biological samples for 1-week-old and 2-week-old WT and *CYCD3;1* OE shoots were hybridized to ATH1 Affymetrix GeneChips, and the average signal detected is shown in columns A-D. A, average signal for 1-week-old WT shoots; B, average signal for 1-week-old *CYCD3;1* OE; C, average signal detected in 2-week-old WT shoots; D, average signal for 2-week-old *CYCD3;1* OE shoots. The robust (defined as four times the same) “difference” calls from the four possible individual pair-wise comparisons between the two duplicate samples for each pair of experiments (2) of values between WT and *CYCD3;1* OE are listed for 1-week-old and 2-week-old shoots in the last columns; “I” indicates a robust “increase,” and “NC” marks a robust “no change” difference call. Where no difference call is given the result was defined as not robust, because the same difference call was not generated for all four comparisons using Affymetrix MicroArray Suite 5.0 software. Note the large number of increased (I) calls at both time points.

1. Menges M, de Jager SM, Gruissem W, Murray JA (2005) Plant J 41:546-566.

2. Masubelele NH, Dewitte W, Menges M, Maughan S, Collins C, Huntley R, Nieuwland J, Scofield S, Murray JA (2005) Proc Natl Acad Sci USA 102:15694-15699.
