# Supplementary material
Source: PubMed Central journal article supplement (PMC1964848)
Supplement: pnas_0704166104_6.pdf [file pnas_0704166104_6.pdf]

**Table 2.** Delayed exit from the mitotic phase conferred by *CYCD3;1* OE

| MIPS ID   | Description (2006)                                                                                                                                                                                                                                         | A       | B        | C       | D       | Robust change call WT | Robust change call <i>CYCD3</i> OE |
|-----------|------------------------------------------------------------------------------------------------------------------------------------------------------------------------------------------------------------------------------------------------------------|---------|----------|---------|---------|-----------------------|------------------------------------|
| At1g44110 | Arath;CYCA1;1                                                                                                                                                                                                                                              | 1163.85 | 3043.4   | 631.45  | 1350.35 | D                     |                                    |
| At5g66230 | expressed protein                                                                                                                                                                                                                                          | 702.95  | 2146.6   | 439.65  | 738.2   | D                     |                                    |
| At5g55520 | similar to expressed protein [Arabidopsis thaliana] (TAIR:At4g26660.1); similar to kinesin heavy chain, putative [Oryza sativa (japonica cultivar-group)] (GB:AAV35794.1)                                                                                  | 324.25  | 758.5    | 153.85  | 365     | D                     |                                    |
| At5g51600 | microtubule associated protein (MAP65/ASE1) family protein, low similarity to SP:P50275 Anaphase spindle elongation protein {Saccharomyces cerevisiae}, protein regulating cytokinesis 1 (PRC1) (Homo sapiens) GI:2865521; contains Pfam profile PF03999   | 507     | 1077.65  | 249.1   | 386.9   | D                     | D                                  |
| At5g36710 | [AT5G36710, expressed protein ];[AT5G36800, expressed protein ]                                                                                                                                                                                            | 2311.3  | 5102.6   | 1431.45 | 2353.35 | D                     |                                    |
| At5g13840 | CCS52b                                                                                                                                                                                                                                                     | 762.45  | 1985.8   | 389.1   | 1206.7  | D                     | NC                                 |
| At4g33260 | [AT4G33270, WD-40 repeat family protein, contains 6 WD-40 repeats (PF00400); WD-repeat protein -Daucus carota,PID:g2253631 ];[AT4G33260, WD-40 repeat family protein, contains 6 WD-40 repeats (PF00400); WD-repeat protein -Daucus carota, PID:g2253631 ] | 1394.05 | 4552.95  | 718.8   | 1878.15 | D                     | NC                                 |
| At4g33400 | dem protein-related / defective embryo and meristems protein-related, identical to dem GI:2190419 from (Lycopersicon esculentum)                                                                                                                           | 1170.75 | 2748.7   | 678.3   | 1630.5  | D                     | NC                                 |
| At4g32830 | Aurora-like kinase 2; ALK2                                                                                                                                                                                                                                 | 1127    | 2973.5   | 680.95  | 1920.3  | D                     |                                    |
| At3g25980 | mitotic spindle checkpoint protein, putative (MAD2), identical to Swiss-Prot:Q9LU93 mitotic spindle checkpoint protein MAD2 (Arabidopsis thaliana)                                                                                                         | 883.3   | 2326.75  | 486.6   | 1099.9  | D                     |                                    |
| At4g05520 | calcium-binding EF hand family protein, similar to EH-domain containing protein 1 from {Mus musculus} SP:Q9WVK4, {Homo sapiens} SP:Q9H4M9, receptor-mediated endocytosis 1 from (Caenorhabditis elegans) GI:13487775, GI:13487777, GI:13487779             | 322.45  | 701.8    | 194.65  | 395.45  | D                     |                                    |
| At3g14190 | expressed protein                                                                                                                                                                                                                                          | 1134.1  | 3263.2   | 683.9   | 1552.25 | D                     | NC                                 |
| At3g12870 | expressed protein                                                                                                                                                                                                                                          | 1150.85 | 2679.95  | 796.75  | 1203.35 | D                     | NC                                 |
| At3g02640 | expressed protein                                                                                                                                                                                                                                          | 2741.7  | 8121.5   | 1617.4  | 3668.85 | D                     | NC                                 |
| At1g72250 | kinesin motor protein-related                                                                                                                                                                                                                              | 310     | 879.45   | 169.95  | 464.4   | D                     | NC                                 |
| At3g03130 | expressed protein; expression supported by MPSS                                                                                                                                                                                                            | 467.45  | 684.95   | 219.8   | 257.7   | D                     | NC                                 |
| At1g33940 | [AT5G18700, protein kinase-related, contains protein kinase domain, INTERPRO:IPR000719 ];[AT1G33940, expressed protein ]                                                                                                                                   | 899.85  | 1975.2   | 686.25  | 1097.35 | D                     | NC                                 |
| At1g18370 | kinesin motor family protein (NACK1), similar to kinesin heavy chain isolog GB:AAB63609 GI:2262101 from (Arabidopsis thaliana)                                                                                                                             | 614.05  | 1660.3   | 346.2   | 792.9   | D                     | NC                                 |
| At1g02730 | cellulose synthase family protein, similar to cellulose synthase catalytic subunit (gi:13925881) from Nicotiana glauca, cellulose synthase-4 (gi:9622880) from Zea mays                                                                                    | 3293.35 | 10152.55 | 1869.75 | 4387.45 | D                     | NC                                 |
| At2g25060 | plastocyanin-like domain-containing protein                                                                                                                                                                                                                | 2876.9  | 7534     | 1628.2  | 3859.5  | D                     |                                    |
| At1g08560 | syntaxin-related protein KNOLLE (KN) / syntaxin 111 (SYP111), identical to SP:Q42374 Syntaxin-related protein KNOLLE (Syntaxin 111) (AtSYP111) {Arabidopsis thaliana}; BAC F22O13 has a deletion of a cytosine at position 7887                            | 2732    | 8422.9   | 1572.1  | 4162.55 | D                     | NC                                 |
| At2g26760 | Arath;CYCB1;4                                                                                                                                                                                                                                              | 616.65  | 1392.05  | 351.8   | 418.65  | D                     | NC                                 |

Data from the experiment described in SI Table 1 were analyzed by identifying mitotic genes (defined as in legend to SI Table 1) whose signals decrease between 1 week-old and 2 week-old shoots in WT and *CYCD3;1* OE. Twenty-two mitotic genes (1) decrease significantly in older shoots, in contrast to a single gene in older shoots of the *CYCD3;1* OE plants. Columns A-D show the average ATH1 GeneChip signals; A, average signal for 1-week-old WT shoots; B, average signal for 1 week-old *CYCD3;1* OE; C, average signal detected in 2-week-old WT shoots; D, average signal for 2-week-old *CYCD3;1* OE shoots. The robust (defined as in legend to SI Table 1) “difference” calls obtained after pairwise comparisons (2) of values for WT and *CYCD3;1* OE are listed for 1-week-old and 2-week-old shoots in the last columns; “D” indicates a robust “decrease,” and “NC” marks a robust “no change” difference call. Note that only a single mitotic gene is robustly decreased in the sample from *CYCD3;1* OE shoots, compared to the 22 genes identified as robustly decreasing in WT samples.

1. Menges M, de Jager SM, Gruissem W, Murray JA (2005) Plant J 41:546-566.

2. Masubelele NH, Dewitte W, Menges M, Maughan S, Collins C, Huntley R, Nieuwland J, Scofield S, Murray JA (2005) Proc Natl Acad Sci USA 102:15694-15699.
