# Supplementary material
Source: PubMed Central journal article supplement (PMC1964848)
Supplement: pnas_0704166104_7.pdf [file pnas_0704166104_7.pdf]

**Table 3.** Levels of endogenous isoprenoid cytokinins and derivatives in WT and *cycd3;1-3* were determined in three replicates (A, B and C) of WT and *cycd3;1-3* seedlings and expressed in pmol/g fresh weight (see *Materials and Methods*).

| Name       | WT        |           |           | <i>cycd3;1-3</i> |           |           |
|------------|-----------|-----------|-----------|------------------|-----------|-----------|
|            | A         | B         | C         | A                | B         | C         |
| trans-Z    | 0.8       | 1.8       | 1.0       | 0.6              | 0.8       | 1.1       |
| cis-Z      | 0.7       | 0.8       | 1.0       | 0.5              | 1.0       | 0.3       |
| DHZ        | BD( <0,5) | BD( <0,5) | BD( <0,5) | BD( <0,5)        | BD( <0,5) | BD( <0,5) |
| IP         | 1.5       | 0.6       | 0.6       | 1.1              | 1.0       | 0.4       |
| trans-ZR   | 0.7       | 1.4       | 4.5       | 1.5              | 2.1       | 1.4       |
| cis-ZR     | 0.2       | 0.8       | 2.2       | 1.0              | 0.8       | 1.0       |
| DHZR       | BD( <0,5) | BD( <0,5) | BD( <0,5) | BD( <0,5)        | BD( <0,5) | BD( <0,5) |
| IPA        | 1.9       | 2.2       | 6.5       | 2.4              | 3.4       | 2.7       |
| ZNG        | 1.7       | 1.8       | 0.5       | 1.1              | 0.3       | 1.1       |
| DHZNG      | BD( <0,5) | BD( <0,5) | BD( <0,5) | BD( <0,5)        | BD( <0,5) | BD( <0,5) |
| IPG        | 4.0       | 4.1       | 3.1       | 2.8              | 3.4       | 3.6       |
| trans-ZR-p | 7.3       | 5.6       | 10.2      | 5.6              | 9.2       | 4.8       |
| cis-ZR-p   | 2.8       | 5.3       | 2.8       | 2.6              | 3.4       | 2.4       |
| IPA-p      | 19.1      | 15.0      | 15.2      | 16.4             | 16.5      | 12.3      |

BD, below detection limit (<0.5 pmol/g); trans-Z, trans-zeatin; cis-Z, cis-zeatin; DHZ, dihydrozeatin; IP, isopentenyladenine; trans-ZR, trans-zeatin riboside; cis-ZR, cis-zeatin riboside; DHZR, dihydrozeatin riboside; IPA, isopentenyladenosine; ZNG, zeatin-N-glucosides; DHZNG, dihydrozeatin-N-glucosides; IPG, isopentenyl adenine-7-glucoside; trans-ZR-p, trans-zeatin riboside-5*i*-monophosphate; cis-ZR-p, cis-zeatin riboside-5*i*-monophosphate; IPA-p, isopentenyladenosine-5*i*-monophosphate.
