# Supplementary material
Source: PubMed Central journal article supplement (PMC1964848)

# Rosette leaves in 30 day old plants

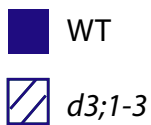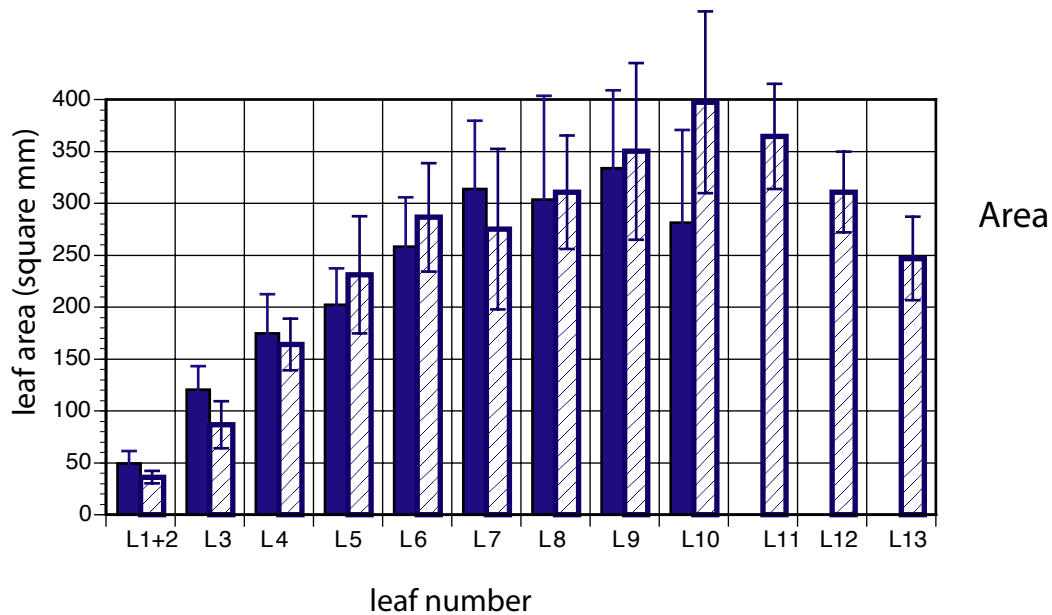

Supplement: pnas_0704166104_3.pdf [file pnas_0704166104_3.pdf]
